# Supplementary material
Source: Research Square preprint supplement (doi:10.21203/rs.3.rs-10106174/v1)
Supplement: Supplementary file 1 [file b8454d70c3f1eda3d9aacac0.docx]

**Table 1. Descriptive statistics of variables employed in ESRM**

| **Variable** | **Explanation of variable** | **Mean** | **Std Dev** | **Type of variable** | **Expected outcome**  **±** |
| --- | --- | --- | --- | --- | --- |
| Age | Age of household in years | 43.12 | 12.56 | Continuous | ± |
| Education |  |  |  |  |  |
| Primary | Number of years of primary education | 0.628 | 0.484 | Continuous | + |
| Secondary | Number of years of high school education | 0.156 | 0.363 | Continuous | + |
| College | Number of years of college education | 0.193 | 0.395 | Continuous | + |
| Family size | No of family members in the household | 9.86 | 4.78 | Continuous | + |
| Farming experience | No of years of farming experience | 13.45 | 8.21 | Continuous | + |
| Farm size | Area of land in hectares | 4.27 | 4.93 | Continuous | + |
| Farm location | Farm exist in climate vulnerable region | 0.504 | 0.501 | Binary | + |
| CST adopter | CSA adopted or not adopted | 0.867 | 0.34 | Binary | + |
| Access to extension | Access to extension during rice growing | 0.212 | 0.409 | Binary | + |
| Farmers contact with local group | Farmers contact with local farming groups | 0.532 | 0.499 | Binary | + |
| Access to credit | Access to credit institute to get loan | 0.206 | 0.405 | Binary | + |
| Distance to extension | Distance between farmers resident and extension offices (in KM) | 20.15 | 7.64 | Continuous | − |
| Climate resilient information | Receive climate resilient information during rice crop | 0.487 | 0.5 | Binary | + |
| Perceived impact of climate change (CC) | Farmers perception and judgment regarding climate change | 0.309 | 0.462 | Binary | + |
| Source: Authors own study 2025 | | | | | |

| **Table: 2. CST adoption rate in the study area** | | | |
| --- | --- | --- | --- |
| **Name** | **CST non-adopter** | **CST Adopters** | **Percentage** |
| ***Productivity-Increasing Techniques (PInT)*** | |  |  |
| Climate-resilient seed varieties | 92 | 162 | 63.78 |
| Efficient use of inorganic fertilizer | 136 | 118 | 46.45 |
| Land laser leveling | 101 | 153 | 60.23 |
| Farm manure application | 228 | 26 | 10.23 |
|  |  | Mean=45.17 | |
| ***Climate-Resilience Techniques (CRT)*** | | | |
| Water-resilient techniques | 122 | 133 | 52.36 |
| Modifying date of sowing and planting | 181 | 73 | 28.74 |
|  |  | Mean=40.55 | |
| ***Climate-risk Management Techniques (CRMT)*** | | | |
| Climate-information | 225 | 29 | 11.41 |
| Crop rotation | 239 | 15 | 5.90 |
| Crop diversification | 234 | 20 | 7.87 |
| Integrated farm management | 187 | 67 | 26.37 |
|  |  | Mean=12.88 | |
| Source: Authors own study 2025 | | | |

**Table 3. Multicollinearity Test**

| **Variable** | **VIF** | **1/VIF** |
| --- | --- | --- |
| Age | 1.39 | 0.71 |
| Education | | |
| Primary | 2.08 | 0.48 |
| Secondary | 1.91 | 0.52 |
| College | 1.96 | 0.51 |
| Family size | 1.55 | 0.64 |
| Farming experience | 1.52 | 0.65 |
| Farm size | 1.28 | 0.78 |
| Farm location | 1.18 | 0.84 |
| CST adopter | 2.45 | 0.40 |
| Access to extension | 1.83 | 0.54 |
| Farmers contact with local group | 1.69 | 0.59 |
| Access to credit | 1.36 | 0.73 |
| Distance to extension | 1.79 | 0.55 |
| Climate resilient information | 1.47 | 0.68 |
| Perceived impact of climate change (CC) | 1.38 | 0.72 |
| **Mean** | **1.66** | **0.62** |
| Source: Authors own study 2025 |  |  |

| **Table: 4. Multinomial Endogenous Switching Regression Model (Base outcome=Non-adopter’s)** | | | | |
| --- | --- | --- | --- | --- |
| **Variable** | **PInT** | **CRT** | **CRMT** | **Combine Techniques** |
| Age | -0.012*  (0.007) | -0.008  (0.008) | 0.005  (0.011) | -0.021**  (0.009) |
| Education | | | | |
| Primary | 0.214  (0.184) | 0.187  (0.201) | 0.532*  (0.295) | 0.389**  (0.177) |
| Secondary | 0.398**  (0.191) | 0.312  (0.214) | 0.674**  (0.321) | 0.713***  (0.182) |
| College/University | 0.756***  (0.232) | 0.692***  (0.261) | 1.012***  (0.387) | 1.245***  (0.244) |
| Family size | 0.021  (0.014) | 0.017  (0.015) | 0.035  (0.023) | 0.029*  (0.016) |
| Farming experience | 0.008  (0.009) | 0.012  (0.010) | 0.019  (0.014) | 0.015  (0.010) |
| Access to extension | 0.276*  (0.154) | 0.198  (0.162) | 0.321*  (0.213) | 0.409**  (0.174) |
| Farmers contact with local groups | 0.315**  (0.147) | 0.276*  (0.158) | 0.487**  (0.206) | 0.521***  (0.162) |
| Farm size | 0.067**  (0.028) | 0.054*  (0.031) | 0.088**  (0.040) | 0.103***  (0.029) |
| Farm location | 0.132  (0.158) | 0.089  (0.172) | 0.211  (0.241) | 0.176  (0.163) |
| Access to credit | 0.438***  (0.160) | 0.365**  (0.173) | 0.512**  (0.231) | 0.668***  (0.184) |
| CST adopter | 0.567***  (0.191) | 0.423**  (0.206) | 0.689**  (0.292) | 0.947***  (0.203) |
| Distance to extension | -0.031***  (0.008) | -0.027***  (0.009) | -0.041***  (0.012) | -0.038***  (0.009) |
| Climate resilient information | 0.192**  (0.084) | 0.301***  (0.092) | 0.185*  (0.111) | 0.347***  (0.096) |
| Perceived impact of CC | 0.141*  (0.078) | 0.223**  (0.085) | 0.117  (0.107) | 0.269**  (0.091) |
| Constant | -1.234**  (0.512) | -1.987***  (0.574) | -3.456***  (0.821) | -2.134***  (0.609) |
| Observations | 254 | 254 | 254 | 254 |
| Log-likelihood | -389.47 |  |  |  |
| Pseudo R square | 0.176 |  |  |  |
| Wald x2(60) | 245.3*** |  |  |  |
| Significance level: ***, **, *. p<0.01 (1%), p<0.05 (5%), p<0.10(10%) | | | | |
| Source: Authors own study 2025 | | | | |

| **Table: 5. Yield (kg/ha) Regression Model with selection correction, by adopter’s regime** | | | | | |
| --- | --- | --- | --- | --- | --- |
| **Variable** | **Non adopter**  **(40)** | **PInT**  **(n=212)** | **CRT**  **(n=164)** | **CRMT**  **(n=96)** | **Combine Techniques**  **(Full-n=214)** |
| Age | 12.4  (10.2) | 8.7  (8.9) | 15.2*  (8.5) | 6.3  (14.1) | 10.1  (7.8) |
| Education | | | | | |
| Primary | 187.3  (142.1) | 245.1*  (129.8) | 302.4**  (137.2) | 198.7  (204.3) | 276.5**  (118.4) |
| Secondary | 334.2**  (151.7) | 421.6***  (136.4) | 487.3***  (147.1) | 354.2*  (218.9) | 512.8***  (129.7) |
| College/University | 512.6***  (182.3) | 645.3***  (167.2) | 723.8***  (179.5) | 567.1**  (262.4) | 834.2***  (162.1) |
| Family size | -18.7  (12.5) | -22.4*  (11.9) | -15.8  (12.7) | -26.3  (18.5) | -19.6  (11.2) |
| Farming experience | 5.6  (6.7) | 8.3  (6.2) | 10.4  (6.9) | 7.2  (9.8) | 11.8*  (6.3) |
| Access to extension | 87.5  (98.2) | 134.2  (91.5) | 112.3  (98.7) | 98.6  (143.2) | 156.7*  (87.9) |
| Farmers contact with local groups | 123.6  (94.5) | 187.4**  (88.2) | 156.8*  (95.1) | 145.3  (137.8) | 224.5***  (85.6) |
| Farm size | 42.1**  (118.3) | 51.3***  (16.7) | 47.6**  (18.1) | 38.9  (26.3) | 63.4***  (16.2) |
| Farm location | -212.4*  (118.3) | -187.3  (114.5) | -154.2  (121.9) | -301.7*  (174.2) | -143.5  (108.7) |
| Access to credit | 178.9*  (102.4) | 232.7**  (96.8) | 201.5*  (104.2) | 189.4  (150.1) | 278.3***  (93.7) |
| CST adopter | 156.2  (131.4) | 213.5*  (123.7) | 187.4  (132.5) | 235.8  (190.4) | 278.6**  (119.3) |
| Lambda | 312.7*  (178.5) | 456.2**  (201.3) | 387.4*  (213.7) | 512.8**  (248.5) | 278.6*  (167.4) |
| Constant | 4123.8***  (387.2) | 4356.2***  (362.1) | 4289.5***  (389.4) | 3978.3***  (564.2) | 4689.1***  (352.7) |
| R-squared | 0.624 | 0.671 | 0.648) | 0.593 | 0.712 |
| F-statistics | 7.8*** | 9.2*** | 8.1*** | 5.3** | 14.5*** |
| Significance level: ***, **, *. p<0.01 (1%), p<0.05 (5%), p<0.10(10%) | | | | | |
| Source: Authors own study 2025 | | | | | |

| **Table 6. Average Treatment Effects of CST adoption on yield (kg/ha) comparison with non-adopters** | | | | |
| --- | --- | --- | --- | --- |
| **CS Technique** | **ATE** | **Std error** | **t-statistics** | **p-value** |
| **PInT** | 452.3 | 187.6 | 2.41 | 0.017** |
| **CRT** | 328.7 | 201.4 | 1.63 | 0.104 |
| **CRMT** | 294.5 | 243.8 | 1.21 | 2.228 |
| **All Techniques** | 687.2 | 162.9 | 4.22 | <0.001*** |
| Significance level: ***, **, *. p<0.01 (1%), p<0.05 (5%), p<0.10(10%) | | | | |
| Source: Authors own study 2025 | | | | |
